# Supplementary material for: Simultaneous quantification of marine neutral neoagaro-oligosaccharides and agar-oligosaccharides by the UHPLC-MS/MS method: application to the intestinal transport study by using the Caco-2 cell monolayer
Source: Royal Society of Chemistry journal article supplement (doi:10.1039/d2ay00700b), 2022-01-01
Supplement: d2ay00700b1.pdf [file d2ay00700b1.pdf]

## Supplementary Data

### **Simultaneous quantification of marine neutral neoagaro-oligosaccharides and agar-oligosaccharides by UHPLC-MS/MS method: Application to the intestinal transport study by Caco-2 cells monolayer**

Guilin Liu,<sup>a</sup> Yunhai Duan,<sup>a</sup> Shuang Yang,<sup>abcd</sup> Mingming Yu<sup>\*abcd</sup> and Zhihua Lv<sup>\*abcd</sup>

<sup>a</sup> School of Medicine and Pharmacy, Ocean University of China, Qingdao 266003, People's Republic of China

<sup>b</sup> Laboratory for Marine Drugs and Bioproducts of Qingdao National Laboratory for Marine Science and Technology, Qingdao 266003, People's Republic of China

<sup>c</sup> Key Laboratory of Glycoscience & Glycotechnology of Shandong Province, Qingdao 266003, People's Republic of China

<sup>d</sup> Key Laboratory of Marine Drugs, Ministry of Education of China, Qingdao 266003, People's Republic of China

\*Corresponding Authors

E-mail: yumingming@ouc.edu.cn (Mingming Yu); lvzhihua@ouc.edu.cn (Zhihua Lv)

Table S1 Apparent permeability coefficient of NAOS (DP 2, 4, 6) and AOS (DP 3, 5, 7) under different regulators

Fig. S1 Cytotoxicity assay of NA2 (a), NA4 (b), NA6 (c), A3 (d), A5 (e) and A7 (f) at the range of 50-5000  $\mu\text{mol L}^{-1}$ .

Fig. S2 Calibration curve of NAOS (DP 2, 4, 6) and AOS (DP 3, 5, 7) at the range of 40-20000 nmol L<sup>-1</sup>.

Table S1 Apparent permeability coefficient of NAOS (DP 2, 4, 6) and AOS (DP 3, 5, 7) under different regulators

| Compound | Regulator             | $P_{app, ab}$<br>( $10^{-6} \text{ cm s}^{-1}$ ) | $P_{app, ba}$<br>( $10^{-6} \text{ cm s}^{-1}$ ) | ER   |
|----------|-----------------------|--------------------------------------------------|--------------------------------------------------|------|
| NA2      | -                     | $13.83 \pm 2.07$                                 | $6.98 \pm 0.61$                                  | 0.50 |
|          | + Phloretin           | $12.76 \pm 1.41$                                 | $6.52 \pm 1.02$                                  | 0.51 |
|          | + Phlorizin           | $13.98 \pm 1.94$                                 | $7.02 \pm 1.65$                                  | 0.50 |
|          | + Quercetin           | $13.77 \pm 2.39$                                 | $6.55 \pm 2.24$                                  | 0.48 |
|          | + Sodium deoxycholate | $23.36 \pm 4.06$                                 | $17.09 \pm 2.31$                                 | 0.73 |
| NA4      | -                     | $6.45 \pm 0.47$                                  | $4.20 \pm 0.23$                                  | 0.65 |
|          | + Phloretin           | $6.07 \pm 0.81$                                  | $3.52 \pm 1.02$                                  | 0.58 |
|          | + Phlorizin           | $6.38 \pm 1.13$                                  | $4.12 \pm 1.21$                                  | 0.64 |
|          | + Quercetin           | $6.35 \pm 0.39$                                  | $3.87 \pm 1.05$                                  | 0.61 |
|          | + Sodium deoxycholate | $10.31 \pm 1.62$                                 | $9.88 \pm 2.04$                                  | 0.95 |
| NA6      | -                     | $4.71 \pm 0.83$                                  | $4.14 \pm 0.36$                                  | 0.88 |
|          | + Phloretin           | $4.61 \pm 1.30$                                  | $4.53 \pm 1.11$                                  | 0.98 |
|          | + Phlorizin           | $4.82 \pm 0.95$                                  | $4.31 \pm 1.56$                                  | 0.89 |
|          | + Quercetin           | $4.43 \pm 1.21$                                  | $3.92 \pm 0.83$                                  | 0.88 |
|          | + Sodium deoxycholate | $9.96 \pm 1.40$                                  | $10.30 \pm 1.89$                                 | 1.03 |
| A3       | -                     | $7.15 \pm 1.48$                                  | $4.41 \pm 0.32$                                  | 0.62 |
|          | + Phloretin           | $7.05 \pm 0.73$                                  | $4.97 \pm 0.86$                                  | 0.74 |
|          | + Phlorizin           | $6.68 \pm 0.64$                                  | $4.85 \pm 0.77$                                  | 0.70 |
|          | + Quercetin           | $7.16 \pm 0.81$                                  | $4.11 \pm 0.27$                                  | 0.57 |
|          | + Sodium deoxycholate | $13.72 \pm 2.19$                                 | $10.81 \pm 0.31$                                 | 0.79 |
| A5       | -                     | $4.34 \pm 0.24$                                  | $3.05 \pm 0.07$                                  | 0.70 |
|          | + Phloretin           | $4.25 \pm 0.73$                                  | $3.31 \pm 0.27$                                  | 0.78 |
|          | + Phlorizin           | $4.08 \pm 0.49$                                  | $3.11 \pm 0.77$                                  | 0.76 |
|          | + Quercetin           | $4.60 \pm 0.70$                                  | $2.79 \pm 0.27$                                  | 0.61 |
|          | + Sodium deoxycholate | $10.06 \pm 1.76$                                 | $8.49 \pm 2.09$                                  | 0.84 |
| A7       | -                     | $3.27 \pm 0.44$                                  | $3.58 \pm 0.33$                                  | 1.09 |
|          | + Phloretin           | $3.54 \pm 0.63$                                  | $3.50 \pm 0.46$                                  | 0.99 |
|          | + Phlorizin           | $3.14 \pm 0.60$                                  | $3.47 \pm 0.62$                                  | 1.10 |
|          | + Quercetin           | $3.48 \pm 0.71$                                  | $3.23 \pm 0.27$                                  | 0.93 |
|          | + Sodium deoxycholate | $6.21 \pm 0.87$                                  | $6.79 \pm 0.91$                                  | 1.09 |

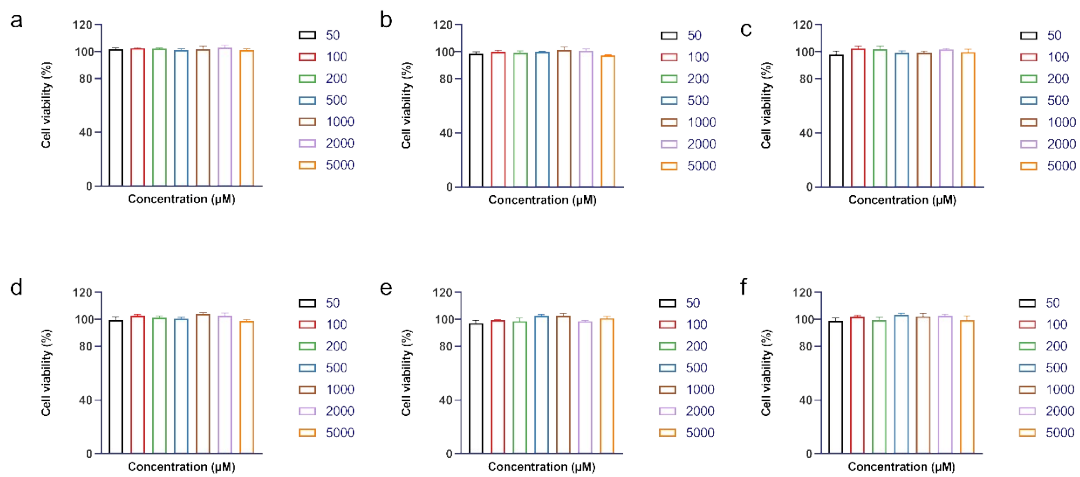

Fig. S1 Cytotoxicity assay of NA2 (a), NA4 (b), NA6 (c), A3 (d), A5 (e) and A7 (f) at the range of 50-5000  $\mu\text{mol L}^{-1}$ .

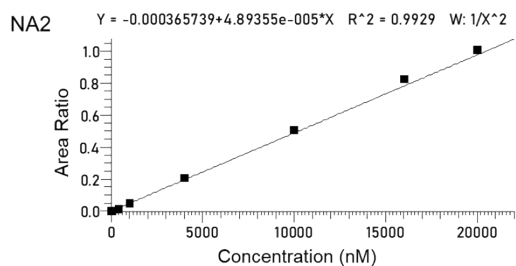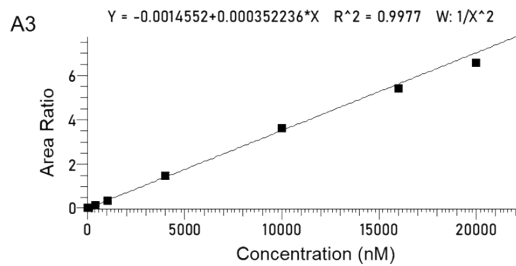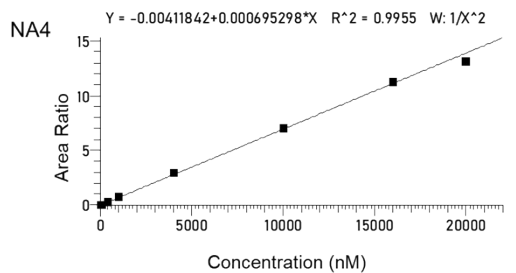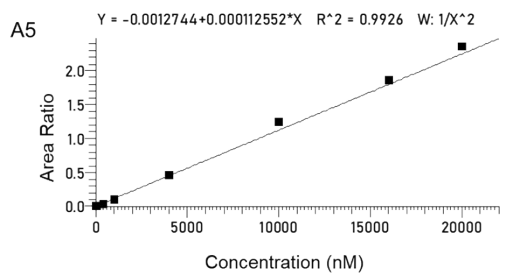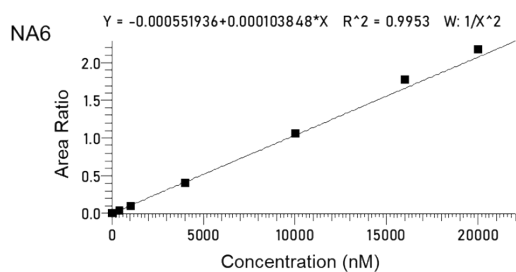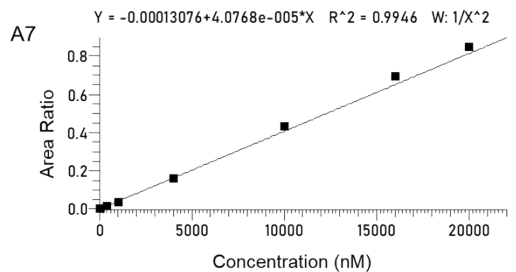

Fig. S2 Calibration curve of NAOS (DP 2, 4, 6) and AOS (DP 3, 5, 7) at the range of 40-20000 nmol L<sup>-1</sup>.
